# Supplementary material for: Iron supplementation is sufficient to rescue skeletal muscle mass and function in cancer cachexia
Source: PubMed Central journal article supplement (PMC8982578; doi:10.15252/embr.202153746), 2022-02-24
Supplement: EMBR-23-e53746-s009.pdf [file EMBR-23-e53746-s009.pdf]

## Expanded View Figures

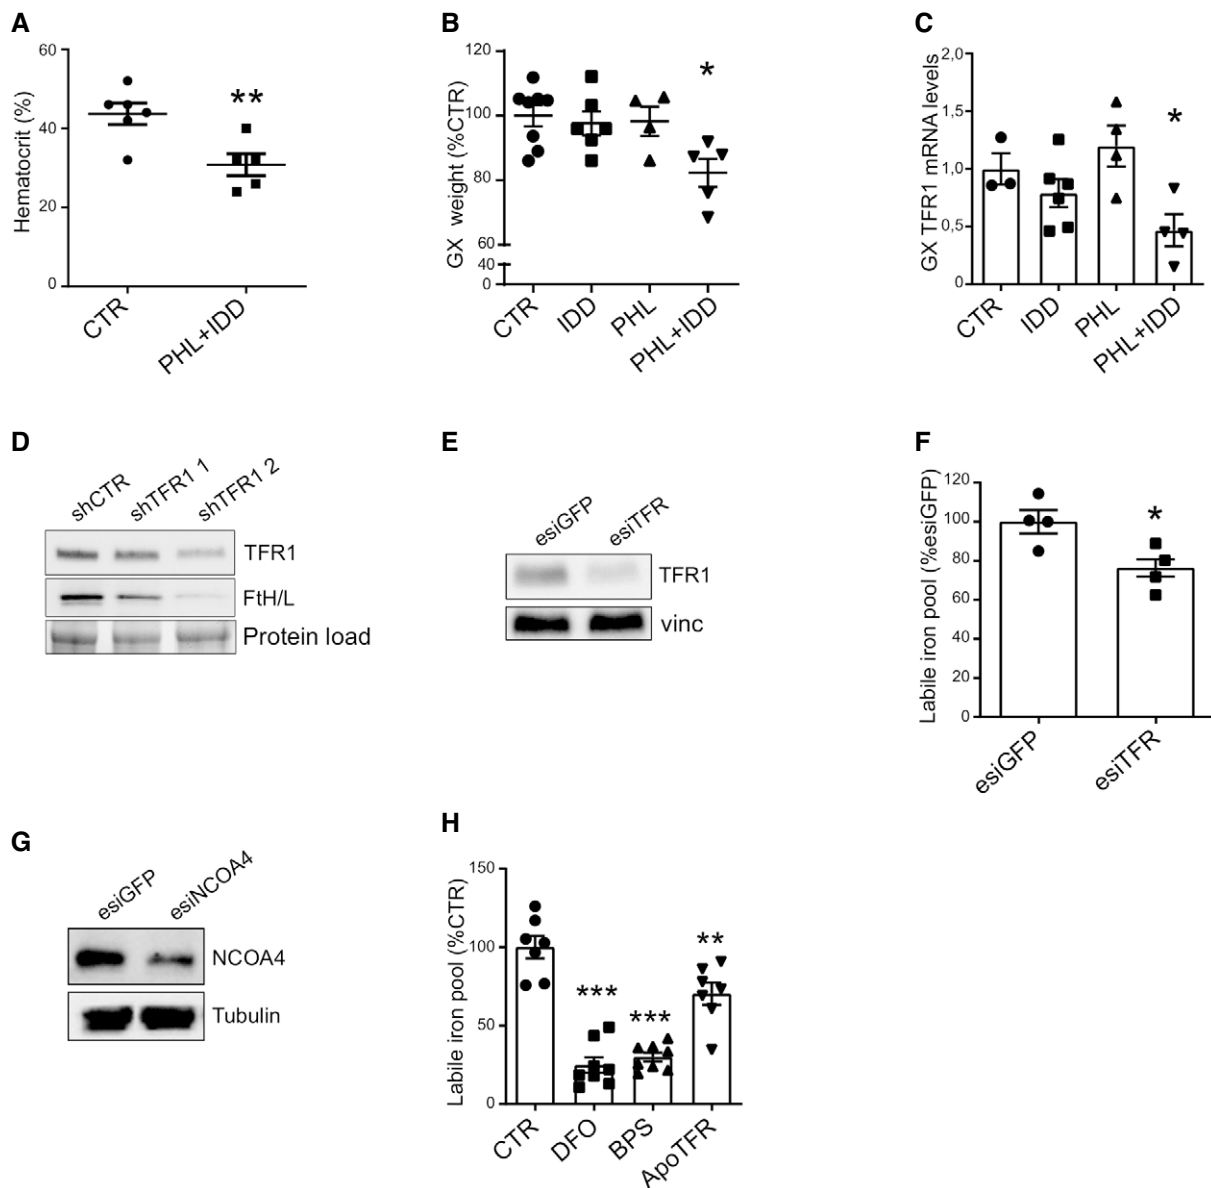

**Figure EV1. Iron deficiency induces skeletal muscle atrophy.**

- A Hematocrit in mice subjected to iron deprivation by a combination of iron-deficient diet (IDD) and phlebotomy (PHL) ( $n = 5-6$ ).
- B Gastrocnemius weight in mice subjected to iron deprivation by iron-deficient diet (IDD), phlebotomy (PHL), or a combination of both ( $n = 4-8$ ).
- C Gastrocnemius TFR1 mRNA levels in mice after iron deprivation by iron-deficient diet (IDD), phlebotomy (PHL) or a combination of both ( $n = 3-6$ ).
- D Representative Western blot of TFR1 and ferritin after transfection with shTFR1-pGFP in 3T3 cells ( $n = 3$ ).
- E Representative Western blot of TFR1 after knockdown in C2C12 myotubes ( $n = 3$ ).
- F Labile iron pool in C2C12 myotubes after TFR1 knockdown ( $n = 3$ ).
- G Representative Western blot of NCOA4 after knockdown in C2C12 myotubes ( $n = 3$ ).
- H Labile iron pool in C2C12 myotubes treated with iron chelators DFO, BPS, or apo-transferrin ( $n = 3$ ).

Data information: For all data,  $n$  represents the number of biological replicates. Statistical significance was calculated by unpaired, two-tailed Student's  $t$ -test (A, F) or one-way Anova with Bonferroni's correction (B, C, and H). Data are mean  $\pm$  SEM. \* $P < 0.05$ , \*\* $P < 0.01$ , \*\*\* $P < 0.001$ .

**Figure EV2. Altered iron metabolism in the skeletal muscle is a feature of cancer-induced cachexia.**

- A Hematocrit levels of C26 tumor-bearing mice at day 12 post C26 injection ( $n = 3-6$ ).
- B Body weight evolution of mice after C26 injection ( $n = 6$ ).
- C Quadriceps weight of C26 tumor-bearing mice normalized to tibial length ( $n = 6$ ).
- D Liver TFR1 mRNA levels normalized to 18s in C26 tumor-bearing mice ( $n = 5$ ).
- E Total liver iron content in C26 tumor-bearing mice ( $n = 11$ ).
- F, G Total body weight (F) and gastrocnemius weight (G) in LLC tumor-bearing mice ( $n = 5-6$ ).
- H TFR1 mRNA levels normalized to 18s in the gastrocnemius of LLC tumor-bearing mice ( $n = 3$ ).
- I, J Total body weight gain (I) and gastrocnemius weight (J) of BaF-transplanted mice ( $n = 6-8$ ).
- K TFR1 mRNA levels normalized to 18s in the gastrocnemius of BaF-transplanted mice ( $n = 6-8$ ).
- L Raw blots of Fig 2F RNA electrophoretic mobility shift assay (REMSA). The biotin-labeled IRE probe was incubated without (lane 1) or with cytosolic gastrocnemius extracts from CTR and C26 tumor-bearing mice, in native (lane 2) or reducing conditions (lane 4). Where indicated, unlabeled IRE probe was added in 200-fold molar excess (lanes 3 and 5) ( $n = 3$ ).

Data information: For all data,  $n$  represents the number of biological replicates. Statistical significance was calculated by unpaired, two-tailed Student's  $t$ -test (A, C-K) or ordinary two-way Anova (B). Data are mean  $\pm$  SEM. \* $P < 0.05$ , \*\* $P < 0.01$ , \*\*\* $P < 0.001$ .

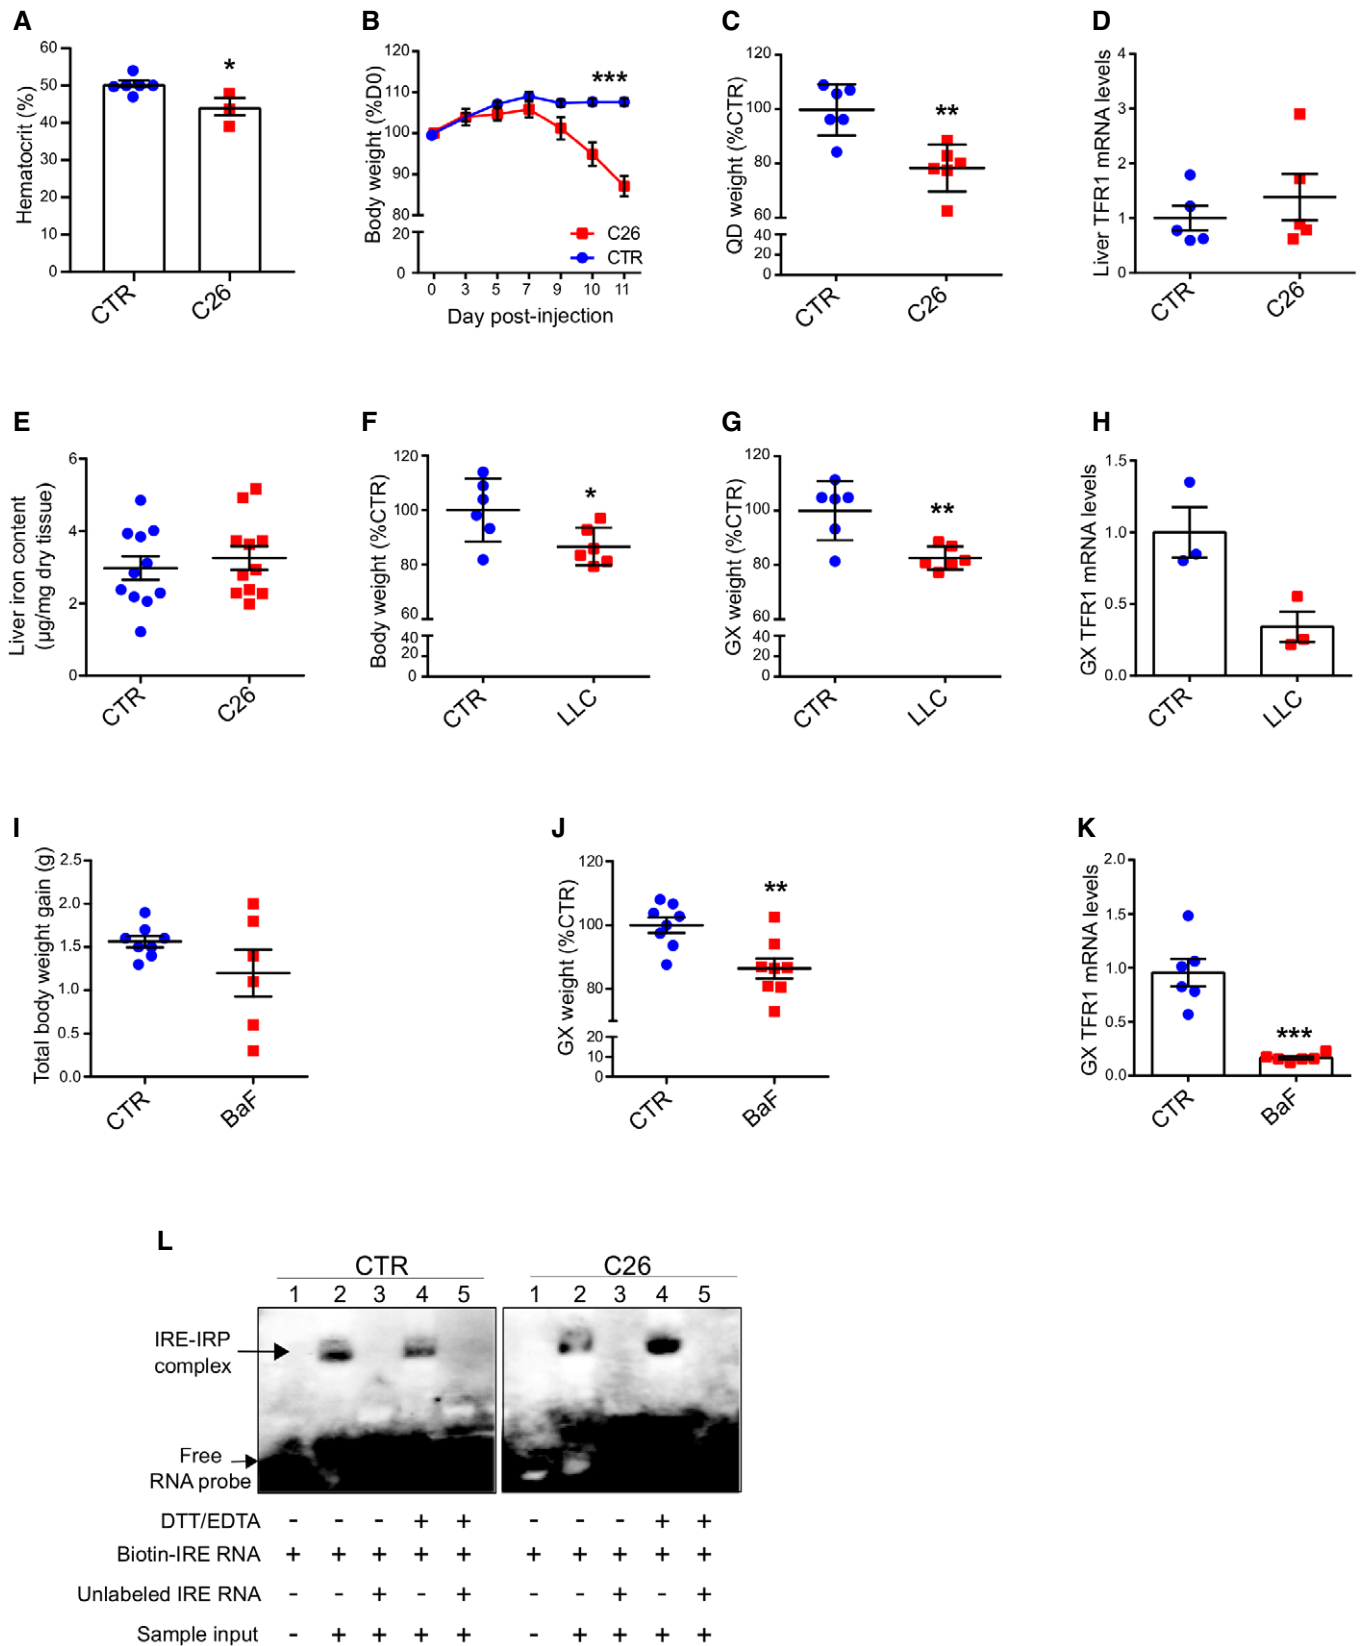

Figure EV2.

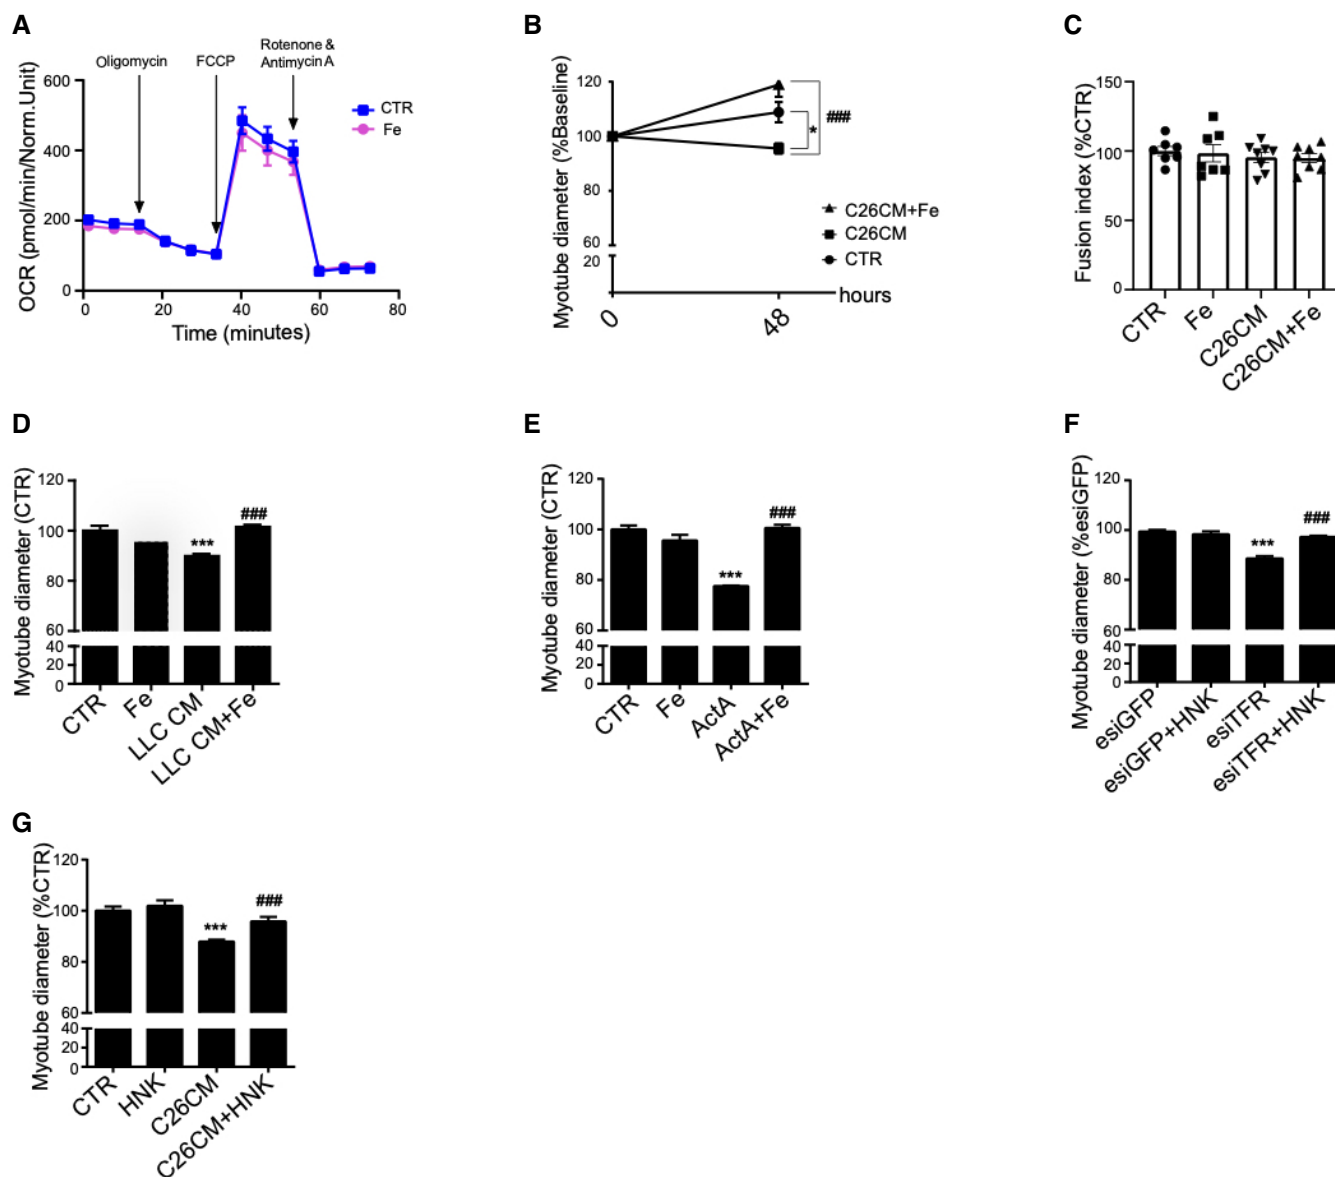

**Figure EV3. Iron enhances mitochondrial function and prevents cancer-induced myotube atrophy.**

A Profile of oxygen consumption rate OCR in C2C12 myotubes after 48 h treatment with ferric citrate ( $n = 6$ ).

B Myotube diameter normalized to Day 0 values ( $n = 3$ ).

C Fusion index of C2C12 myotubes treated with C26 CM and ferric citrate for 48 h ( $n = 7-8$ ).

D Diameter of C2C12 myotubes treated with LLC CM and iron citrate for 48 h ( $n = 3$ ).

E Diameter of C2C12 myotubes treated with Activin A (ActA) and ferric citrate for 48 h ( $n = 3$ ).

F Diameter of TFR1-silenced C2C12 myotubes after 24 h treatment with iron ionophore hinokitiol (HNK) ( $n = 3$ ).

G Diameter of C2C12 myotubes treated with C26 CM and HNK for 48 h ( $n = 3$ ).

Data information: For all data,  $n$  represents the number of biological replicates. Statistical significance was calculated by one-way Anova with Bonferroni's correction (A-E). Data are mean  $\pm$  SEM. \*\*\* $P < 0.001$  compared to control and #### $P < 0.0001$  compared to conditioned medium, ActA, or esiTFR-treated group.

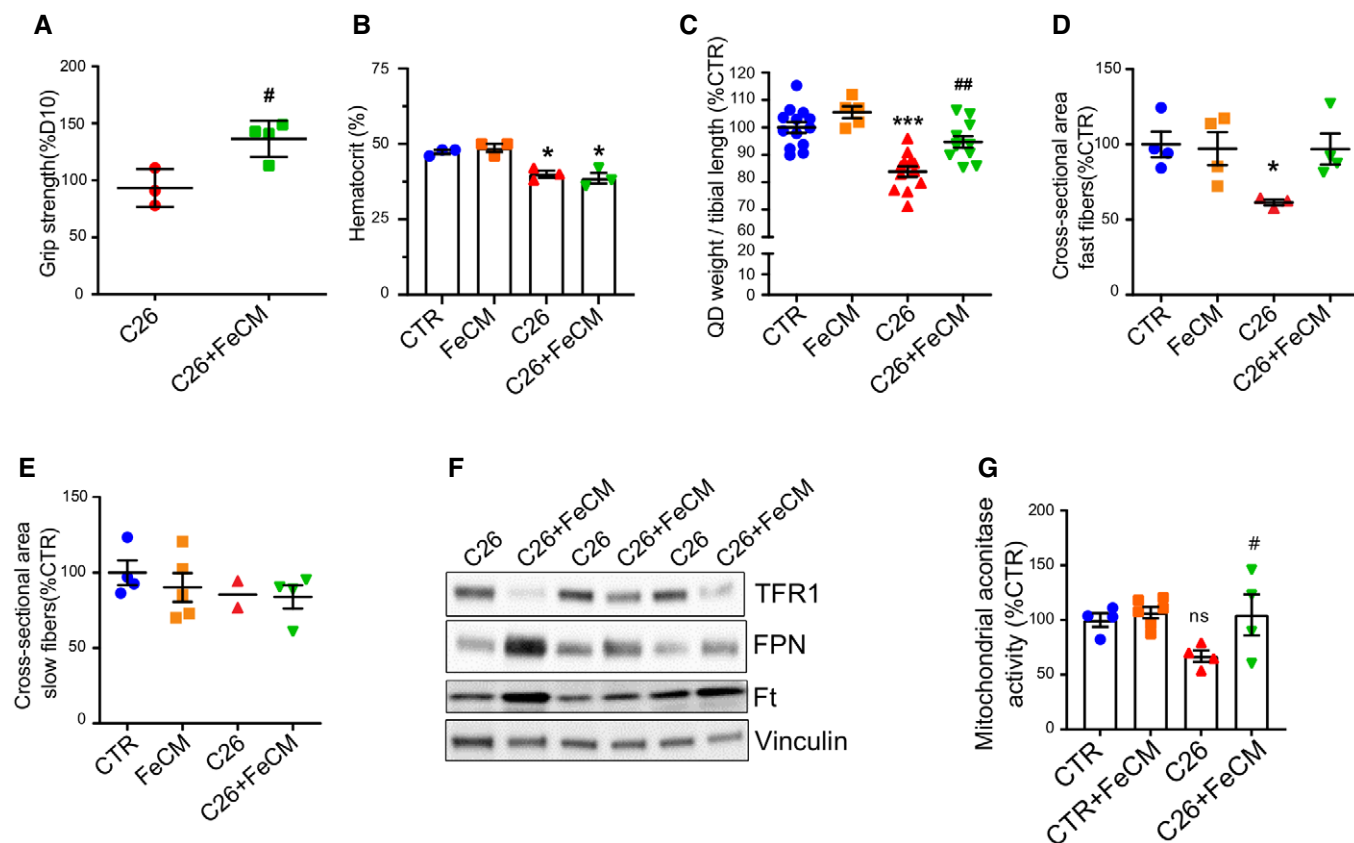

**Figure EV4. Iron supplementation prevents cancer-induced cachexia.**

- A Grip strength of C26 tumor-bearing mice measured at day 11 and normalized to day 10 ( $n = 3-4$ ).
- B Hematocrit in tumor-bearing mice measured on day 12 post C26 injection ( $n = 3$ ).
- C Quadriceps weight normalized to tibial length of C26 tumor-bearing mice at day 12 post C26 injection ( $n = 5-12$ ).
- D, E Average cross-sectional area of fast (D) and slow (E)-twitch muscle fibers ( $n = 2-5$ ).
- F Representative Western blot of iron metabolism proteins in tumor extracts from C26 tumor-bearing mice showing a physiological response to iron loading ( $n = 3$ ).
- G Mitochondrial aconitase activity in quadriceps of C26 tumor-bearing mice supplemented with FeCM ( $n = 4-6$ ).

Data information: For all data,  $n$  represents the number of biological replicates. Statistical significance was calculated by unpaired, two-tailed Student's  $t$ -test (A) or one-way Anova with Bonferroni's correction (B-D). Data are mean  $\pm$  SEM. \* $P < 0.05$ , \*\*\* $P < 0.001$  compared to control and # $P < 0.05$ , ## $P < 0.01$  compared to C26-untreated group.
